# Supplementary material for: Effect of Paralysis at the Time of ProSeal Laryngeal Mask Airway Insertion on Pharyngolaryngeal Morbidities. A Randomized Trial
Source: PubMed Central journal article supplement (PMC4529079; doi:10.1371/journal.pone.0134130), 2015-08-07
Supplement: pone.0134130.s004.pdf [file pone.0134130.s004.pdf]

# 분당서울대학교병원 생명윤리심의위원회

Tel : 82-31-787-1376~1378

Fax : 82-31-787-4025

경기도 성남시 분당구 구미로 173번길 82 (우) 463-707

본 위원회에서 승인된 모든 연구자들은 다음의 사항을 준수하셔야 합니다.

1. 연구계획서 및 변경계획서의 승인 이전에 연구대상자의 해당 임상연구의 참여 금지됩니다.
2. 승인 받은 계획서에 따라 연구를 수행하여야 합니다. 변경계획서에 대한 승인 이전에 원 임상연구 계획서와 다른 임상연구의 실시는 금지됩니다.
3. IRB 승인 받은 동의서를 사용하여야 합니다.
4. 연구대상자에게 강제 혹은 부당한 영향이 없는 상태에서 충분한 설명에 근거하여 동의과정을 수행할 것이며, 잠재적인 연구대상자에게 연구에의 참여여부를 고려할 수 있도록 충분한 기회를 제공하여야 합니다.
5. 연구진행에 있어 연구대상자를 보호하기 위해 불가피한 경우를 제외하고 연구의 어떠한 변경이든 위원회의 사전승인을 받고 수행하여야 합니다. 연구대상자들의 보호를 위해 취해진 어떠한 응급상황에서의 변경도 즉각 위원회에 보고하여야 합니다.
6. 연구대상자에게 발생한 즉각적 위험 요소의 제거가 필요하여 원 계획서와 다르게 연구를 실시해야 하는 경우, 연구대상자에게 발생하는 위험요소를 증가 시키거나 연구의 실시에 중대한 영향을 미칠 수 있는 변경사항, 예상하지 못한 중대한 이상약물/의료기기 반응에 관한 사항, 연구대상자의 안전성이나 임상 연구의 실시에 부정적인 영향을 미칠 수 있는 새로운 정보에 관한 사항은 위원회에 신속히 보고하여야 합니다.
7. 위원회의 승인을 받은 연구대상자 모집 광고문을 사용해야 합니다.
8. 위원회의 승인은 1년을 초과할 수 없습니다. 1년 이상 연구를 지속하고자 하는 경우에는 반드시 연차지속보고를 하여야 하며, 위원회에서 요구한 중간보고주기에 따라 연구 진행과 관련한 보고서를 제출하여야 합니다.
9. 심의결과가 승인이 아닌 경우에는 답변서를 제출하여야 하며, 심의일로부터 6개월 이내에 이루어져야 합니다.
10. 위원회가 연구를 반려하는 경우 이의신청을 할 수 있으며, 같은 사항에 대하여 2번 연속으로 이의 신청은 할 수 없습니다.
11. 연구종료 시에는 종료 및 결과보고서를 작성하여 제출해야 합니다.
12. 생명윤리 및 안전에 관한 법률, 약사법/의료기기법, 헬싱키 선언 및 ICH-GCP 가이드라인 등 국내외 관련 법규를 준수하여야 합니다.
13. 헬싱키선언에 따라 모든 임상시험은 첫 연구대상자를 모집하기 전 공개적으로 접근이 가능한 데이터베이스(primary registry)에 연구에 대하여 공개하여야 하며, 예를 들어 <http://register.clinicaltrials.gov> 를 이용하실 수 있습니다. 상세한 내용은 IRB 홈페이지를 참고하십시오.
14. 승인 받은 연구에 대하여 기관의 내부 점검 및 외부의 실태조사를 받을 수 있습니다. 기관의 내부 점검자, 외부의 모니터링원 및 점검자, 규제기관의 실태조사자 등이 연구 관련 문서(전자문서 포함)에 대한 열람을 요청하는 경우 연구담당자는 이에 적극 협조해야 합니다.

본 통보서에 기재된 사항은 분당서울대학교병원 생명윤리심의위원회의 기록된 내용과 일치함을 증명합니다.  
본 생명윤리심의위원회는 생명윤리 및 안전에 관한 법률, 약사법, 의료기기법 및 ICH-GCP 등 관련 법규를 준수합니다.  
본 연구와 이해관계(Conflict of Interest)가 있는 위원이 있을 경우 연구의 심의에서 배제하였습니다.

# 분당서울대학교병원 생명윤리심의위원회

Tel : 82-31-787-1376~1378  
 Fax : 82-31-787-4025

경기도 성남시 분당구 구미로 173번길 82 (우) 463-707

## 심의결과통보서

|                         |                                                                                                                                                                                                                                                                                |                                                                                                                                                                                                                                                                                                                                                                                                                                                             |                                                                                                                                                                                                                                      |               |  |
|-------------------------|--------------------------------------------------------------------------------------------------------------------------------------------------------------------------------------------------------------------------------------------------------------------------------|-------------------------------------------------------------------------------------------------------------------------------------------------------------------------------------------------------------------------------------------------------------------------------------------------------------------------------------------------------------------------------------------------------------------------------------------------------------|--------------------------------------------------------------------------------------------------------------------------------------------------------------------------------------------------------------------------------------|---------------|--|
| IRB No.                 | B-0905/075-010                                                                                                                                                                                                                                                                 |                                                                                                                                                                                                                                                                                                                                                                                                                                                             | 제출경로                                                                                                                                                                                                                                 | 분당서울대학교병원     |  |
| 연구 과제명                  | (국문)                                                                                                                                                                                                                                                                           | 마취유도시 근이완제 사용이 ProSeal™ Larygeal Mask Airway 삽입과 수술 후 인후통에 미치는 영향                                                                                                                                                                                                                                                                                                                                                                                           |                                                                                                                                                                                                                                      |               |  |
|                         | (영문)                                                                                                                                                                                                                                                                           |                                                                                                                                                                                                                                                                                                                                                                                                                                                             |                                                                                                                                                                                                                                      |               |  |
|                         | Protocol No.                                                                                                                                                                                                                                                                   |                                                                                                                                                                                                                                                                                                                                                                                                                                                             | Version No.                                                                                                                                                                                                                          |               |  |
| 연구자                     | 성명                                                                                                                                                                                                                                                                             | 소속                                                                                                                                                                                                                                                                                                                                                                                                                                                          | 직위                                                                                                                                                                                                                                   | 전공분야          |  |
|                         | 책임연구자                                                                                                                                                                                                                                                                          | 나효석                                                                                                                                                                                                                                                                                                                                                                                                                                                         | 마취통증의학과                                                                                                                                                                                                                              | 교수(촉탁교수이상)    |  |
|                         | 의뢰기관                                                                                                                                                                                                                                                                           |                                                                                                                                                                                                                                                                                                                                                                                                                                                             |                                                                                                                                                                                                                                      |               |  |
| 생명윤리 및 안전에 관한 법률에 따른 분류 | <input type="checkbox"/> 인간대상연구 <input type="checkbox"/> 인체유래물연구 <input type="checkbox"/> 배아줄기세포주이용연구 <input type="checkbox"/> 배아연구<br><input type="checkbox"/> 체세포복제배아연구 <input type="checkbox"/> 단성생식배아연구 <input type="checkbox"/> 배아생성의료기관 <input type="checkbox"/> 인체유래물은행 |                                                                                                                                                                                                                                                                                                                                                                                                                                                             |                                                                                                                                                                                                                                      |               |  |
| 연구 종류                   | 임상시험 외 연구                                                                                                                                                                                                                                                                      | <input type="checkbox"/> 증례보고 <input type="checkbox"/> 생태학적 연구 <input type="checkbox"/> 단면조사 연구<br><input type="checkbox"/> 조사,설문,인터뷰 연구 <input type="checkbox"/> 환자군 연구(case series) <input type="checkbox"/> 환자-대조군연구<br><input type="checkbox"/> 인체유래물 저장소 연구 <input type="checkbox"/> 등록(레지스트리)연구<br><input type="checkbox"/> 시판후사용성적조사(PMS) <input type="checkbox"/> 전향적 코호트 연구 <input type="checkbox"/> 후향적 코호트 연구<br><input type="checkbox"/> 기타 ( ) |                                                                                                                                                                                                                                      |               |  |
|                         | 임상시험                                                                                                                                                                                                                                                                           | 연구대상                                                                                                                                                                                                                                                                                                                                                                                                                                                        | <input type="checkbox"/> 의약품 <input type="checkbox"/> 생물학적제제 <input type="checkbox"/> 화장품 <input type="checkbox"/> 건강기능식품<br><input type="checkbox"/> 의료기기(분류번호(등급):) <input checked="" type="checkbox"/> 기타 ( 약물주입시기에 따른 시술의 시점변화 ) |               |  |
|                         | Phase                                                                                                                                                                                                                                                                          | 일반명                                                                                                                                                                                                                                                                                                                                                                                                                                                         |                                                                                                                                                                                                                                      | 상품명           |  |
|                         | 식약처 승인 대상 여부                                                                                                                                                                                                                                                                   | <input type="checkbox"/> 제 1 상 <input type="checkbox"/> 제 1/2 상 <input type="checkbox"/> 제 2 상 <input type="checkbox"/> 제 2/3 상 <input type="checkbox"/> 제 3 상 <input type="checkbox"/> 제 4 상<br><input type="checkbox"/> 생물학적동등성 <input type="checkbox"/> PMS 연구 <input type="checkbox"/> Phase 분류 없음 <input type="checkbox"/> 기타 ( )                                                                                                                      |                                                                                                                                                                                                                                      |               |  |
|                         | 임상시험 목적                                                                                                                                                                                                                                                                        | <input type="checkbox"/> 식약처 승인 대상 <input type="checkbox"/> 승인 제외 대상<br>* 식약처 승인 절차 진행 중인 경우 추 후 식약처 승인서 제출 바랍니다.                                                                                                                                                                                                                                                                                                                                           |                                                                                                                                                                                                                                      |               |  |
|                         | 연구계획서승인일                                                                                                                                                                                                                                                                       | 2009년 07월 01일                                                                                                                                                                                                                                                                                                                                                                                                                                               |                                                                                                                                                                                                                                      | (정기보고주기 : 1년) |  |
| 승인유효 만료일                | ~ 2010년 06월 30일 까지                                                                                                                                                                                                                                                             |                                                                                                                                                                                                                                                                                                                                                                                                                                                             |                                                                                                                                                                                                                                      |               |  |
| 심의종류                    | <input type="checkbox"/> 정규심의 <input checked="" type="checkbox"/> 신속심의 <input type="checkbox"/> 긴급심의                                                                                                                                                                           |                                                                                                                                                                                                                                                                                                                                                                                                                                                             | 심의대상                                                                                                                                                                                                                                 | 검토의견에대한답변서    |  |
| 접수일자                    |                                                                                                                                                                                                                                                                                |                                                                                                                                                                                                                                                                                                                                                                                                                                                             | 심의일자                                                                                                                                                                                                                                 | 2009년 07월 01일 |  |
| 심의결과통보일                 | 2009년 07월 08일                                                                                                                                                                                                                                                                  |                                                                                                                                                                                                                                                                                                                                                                                                                                                             |                                                                                                                                                                                                                                      |               |  |
| 심의목록                    | <input checked="" type="checkbox"/> 시정승인결정에 대한 답변서<br><input checked="" type="checkbox"/> 연구계획서<br><input checked="" type="checkbox"/> 피험자 설명문 및 동의서<br><input checked="" type="checkbox"/> 피험자보상규약                                                                            |                                                                                                                                                                                                                                                                                                                                                                                                                                                             |                                                                                                                                                                                                                                      |               |  |
| 심의결과                    | 승인                                                                                                                                                                                                                                                                             |                                                                                                                                                                                                                                                                                                                                                                                                                                                             |                                                                                                                                                                                                                                      |               |  |
| 심의의견                    | 검토완료                                                                                                                                                                                                                                                                           |                                                                                                                                                                                                                                                                                                                                                                                                                                                             |                                                                                                                                                                                                                                      |               |  |

본 통보서에 기재된 사항은 분당서울대학교병원 생명윤리심의위원회의 기록된 내용과 일치함을 증명합니다.  
 본 생명윤리심의위원회는 생명윤리 및 안전에 관한 법률, 약사법, 의료기기법 및 ICH-GCP등 관련 법규를 준수합니다.  
 본 연구와 이해관계(Conflict of Interest)가 있는 위원이 있을 경우 연구의 심의에서 배제하였습니다.

# 분당서울대학교병원 생명윤리심의위원회

Tel : 82-31-787-1376~1378

Fax : 82-31-787-4025

경기도 성남시 분당구 구미로 173번길 82 (우) 463-707

생명윤리심의위원회 위원장

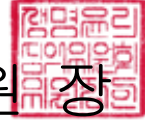

본 통보서에 기재된 사항은 분당서울대학교병원 생명윤리심의위원회의 기록된 내용과 일치함을 증명합니다.  
본 생명윤리심의위원회는 생명윤리 및 안전에 관한 법률, 약사법, 의료기기법 및 ICH-GCP 등 관련 법규를 준수합니다.  
본 연구와 이해관계(Conflict of Interest)가 있는 위원이 있을 경우 연구의 심의에서 배제하였습니다.
